# Supplementary material for: The 1000 Chinese Indigenous Pig Genomes Project provides insights into the genomic architecture of pigs
Source: PubMed Central journal article supplement — Nat Commun. 2024 Nov 22;15:10137. doi: 10.1038/s41467-024-54471-z (PMC11584710; doi:10.1038/s41467-024-54471-z), 2024-11-22
Supplement: 41467_2024_54471_MOESM2_ESM.pdf [file 41467_2024_54471_MOESM2_ESM.pdf]

## **Description of Additional Supplementary Files**

**Supplementary Data 1:** The information of the samples used in this study.

**Supplementary Data 2:** 12 detected OMIA variants in the 1KCIGP dataset.

**Supplementary Data 3:** The 262 public samples were used to evaluate 1KCIGP imputation performance.

**Supplementary Data 4:** 106 additional public samples were used for population structure and introgression analyses.

**Supplementary Data 5:** The result of  $f_4$  statistic to detect admixture between European domestic pigs and Chinese domestic pig populations.

**Supplementary Data 6:** The enriched KEGG pathways for 225 genes located in the introgression regions from ET to European domestic pigs.

Note: The KEGG enrichment analyses were performed with KOBAS. The P value was calculated using a hypergeometric distribution. False discovery rate (FDR) correction was performed to adjust for multiple testing. Pathways with an FDR-corrected P value of  $< 0.05$  were considered statistically significantly enriched.

**Supplementary Data 7:** The result of  $f_4$  statistic to detect admixture among Chinese domestic pig populations.

**Supplementary Data 8:** The expected frequency of European Y chromosomes in Chinese domestic pig populations.

**Supplementary Data 9:** The breed information is used for the selection signature detection of different traits.

**Supplementary Data 10:** Overlapped regions under selection of high-altitude adaptation population.

**Supplementary Data 11:** Overlapped regions under selection of large ear size population.

**Supplementary Data 12:** Overlapped regions under selection of small body size population.

**Supplementary Data 13:** The phenotypes collected for the Chinese domestic pigs in this study.

**Supplementary Data 14:** The GWAS results of biological traits.

Note: P-values are derived from two-sided statistical tests. Only loci with P-values smaller

than the Bonferroni-corrected significance threshold of  $P = 2.29 \times 10^{-9}$  are shown in the table.

**Supplementary Data 15:** The public long-reads are used to validate SVs.

**Supplementary Data 16:** SV validation.

**Supplementary Data 17:** 36 genes overlapped to the SVs had high LD with tag SNPs.

**Supplementary Data 18:** The 277 TWBSVs.

**Supplementary Data 19:** 104 genes affected by TWBSVs.

**Supplementary Data 20:** The primer information of SVs related to *CASP10*, *NAV2*, and *POLD3* genes.
